# Supplementary material for: Flow-Based Dynamic Approach to Assess Bioaccessible Zinc in Dry Dog Food Samples
Source: PubMed Central journal article supplement (PMC7144096; doi:10.3390/molecules25061333), 2020-03-15
Supplement: molecules-25-01333-s001.pdf [file molecules-25-01333-s001.pdf]

## Electronic Supplementary Information

### Flow-based dynamic approach to assess bioaccessible zinc in dry dog food samples

Bruno J. R. Gregório,<sup>1</sup> Ana Margarida Pereira,<sup>2</sup> Sara R. Fernandes,<sup>1</sup> Elisabete Matos,<sup>3</sup> Francisco Castanheira,<sup>4</sup> Agostinho A. Almeida,<sup>1</sup> António J. M. Fonseca,<sup>2</sup> Ana Rita J. Cabrita,<sup>2</sup> Marcela A. Segundo,<sup>1\*</sup>

<sup>1</sup> LAQV, REQUIMTE, Departamento de Ciências Químicas, Faculdade de Farmácia, Universidade do Porto, Rua de Jorge Viterbo Ferreira nº 228, 4050-313 Porto, Portugal

<sup>2</sup> LAQV, REQUIMTE, Instituto de Ciências Biomédicas de Abel Salazar (ICBAS), Universidade do Porto, Rua de Jorge Viterbo Ferreira nº 228, 4050-313 Porto, Portugal

<sup>3</sup> SORGAL, Sociedade de Óleos e Rações S.A., Estrada Nacional 109, Lugar da Pardala, 3880-728 S. João Ovar, Portugal

<sup>4</sup> Alltechaditivos – Alimentação Animal Lda., Parque de Monserrate, Av. Dr. Luis Sá nº 9 - Arm. A, 2710-089 Abrunheira, Portugal

\*Corresponding author.

E-mail: msegundo@ff.up.pt

Tel: +351 220428676

**Table S1.** Main ingredients present on the tested dry dog food samples according to label information.

| Sample # | Main ingredients                                                                                                                  |
|----------|-----------------------------------------------------------------------------------------------------------------------------------|
| 1        | Cereals (maize starch and rapeseed flour) and derivatives of vegetable origin (pea protein).                                      |
| 2        | Meat and animal derivatives (dried poultry protein) and cereals (maize and rice).                                                 |
| 3        | Cereals (rice > 15%), meat and animal derivatives, and derivatives of vegetable origin (vegetable protein extracts).              |
| 4        | Cereals (ground maize), meat and animal derivatives (poultry > 4%), and oils and fats.                                            |
| 5        | Cereals (> rice), cereals (maize protein), and fish and fish derivatives (fish meal).                                             |
| 6        | Cereals, meat and animal derivatives (meat flour), and vegetables (tubers and roots).                                             |
| 7        | Fish and fish derivatives (salmon), vegetables (sweet potato), and oils and fats (chicken fat).                                   |
| 8        | Cereals (maize), derivatives of vegetable origin (cellulose), and meat and animal derivatives (dried chicken and turkey protein). |
| 9        | Cereals (53% whole grain cereals), meat and animal derivatives (chicken > 4%), and vegetables.                                    |
| 10       | Cereals (64% whole grain cereals), meat and animal derivatives (beef > 4%), and vegetables.                                       |
| 11       | Cereals (wheat and oats), fish and fish derivatives (fish meal), and derivatives of vegetable origin (cellulose).                 |
| 12       | Cereals (15% wheat and 15% maize), meat and animal derivatives (10% chicken), and derivatives of vegetable origin (4% peas).      |
| 13       | Cereals (4%rice), meat and animal derivatives (4% chicken), and oils and fats.                                                    |
| 14       | Cereals, meat and animal derivatives, and derivatives of vegetable origin.                                                        |

**Table S2.** Total variance explained obtained by principal component analysis (PCA).

| <b>Initial Eigenvalues</b> |              |                      |                     |
|----------------------------|--------------|----------------------|---------------------|
| <b>Component</b>           | <b>Total</b> | <b>% of Variance</b> | <b>Cumulative %</b> |
| 1                          | 2.423        | 60.572               | 60.572              |
| 2                          | 0.958        | 23.961               | 84.533              |
| 3                          | 0.560        | 14.007               | 98.540              |
| 4                          | 0.058        | 1.460                | 100.000             |

**Table S3.** Component matrix obtained after the extraction method of the PCA.

|                    | <b>Component</b> |          |
|--------------------|------------------|----------|
|                    | <b>1</b>         | <b>2</b> |
| Total amount of Zn | 0.943            | n/a      |
| A                  | 0.904            | -0.339   |
| Market Segment     | 0.743            | n/a      |
| B                  | 0.404            | 0.875    |

**Table S4.** Fraction collection time, fraction volume and total extraction volume for the extraction procedure.

| <b>Fraction #</b> | <b>Collection time<sup>a</sup> / min</b> | <b>Fraction volume<sup>b</sup> / mL</b> | <b>Total extraction volume / mL</b> |
|-------------------|------------------------------------------|-----------------------------------------|-------------------------------------|
| 1                 | 1                                        | 0.5                                     | 0.5                                 |
| 2                 | 2                                        | 0.5                                     | 1.0                                 |
| 3                 | 3                                        | 0.5                                     | 1.5                                 |
| 4                 | 4                                        | 0.5                                     | 2.0                                 |
| 5                 | 5                                        | 0.5                                     | 2.5                                 |
| 6                 | 6                                        | 0.5                                     | 3.0                                 |
| 7                 | 8                                        | 1.0                                     | 4.0                                 |
| 8                 | 10                                       | 1.0                                     | 5.0                                 |
| 9                 | 12                                       | 1.0                                     | 6.0                                 |
| 10                | 14                                       | 1.0                                     | 7.0                                 |
| 11                | 16                                       | 1.0                                     | 8.0                                 |
| 12                | 20                                       | 2.0                                     | 10.0                                |
| 13                | 30                                       | 5.0                                     | 15.0                                |

<sup>a</sup> after complete filling of the collecting tube (CT) (Figure 4)

<sup>b</sup> flow rate of 0.5 mL min<sup>-1</sup>

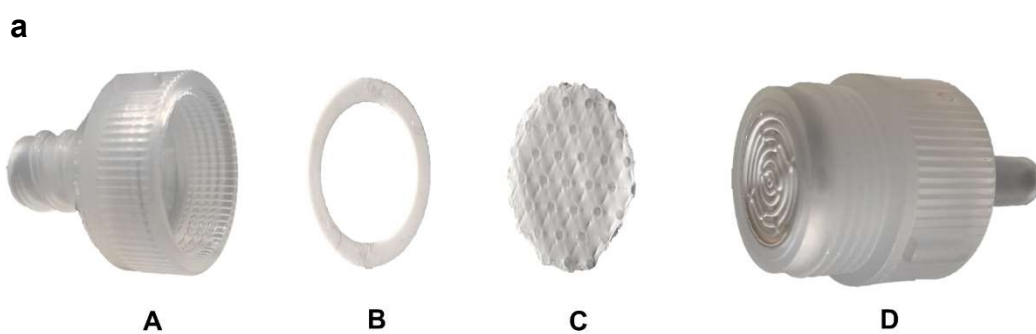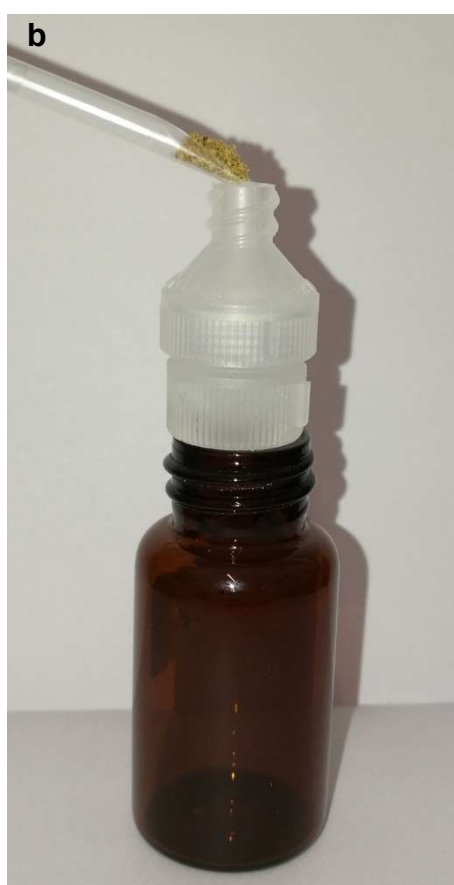

**Figure S1. (a)** Extraction chamber. A and D, polypropylene disk holder; B, O-ring; and C, Fluoropore™ membrane filter (polytetrafluoroethylene) with a 1.0  $\mu\text{m}$  pore. **(b)** After the assembly of all parts, sample is placed inside the A moiety, through its wider opening.

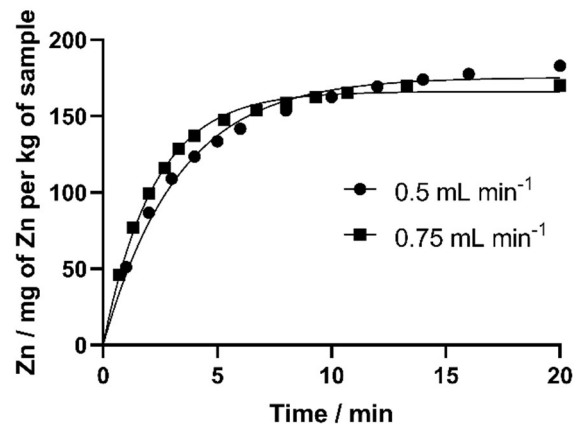

**Figure S2.** Kinetic profiles of bioaccessible Zn obtained for the dynamic extraction using flow rates of 0.5 mL min<sup>-1</sup> and 0.75 mL min<sup>-1</sup>.

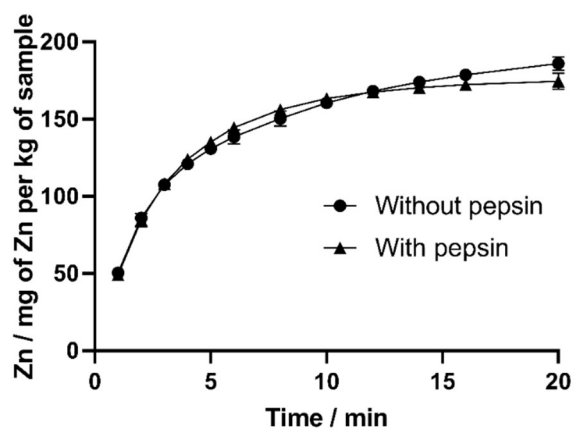

**Figure S3.** Comparison of the extraction profiles with and without pepsin,  $n = 2$ .



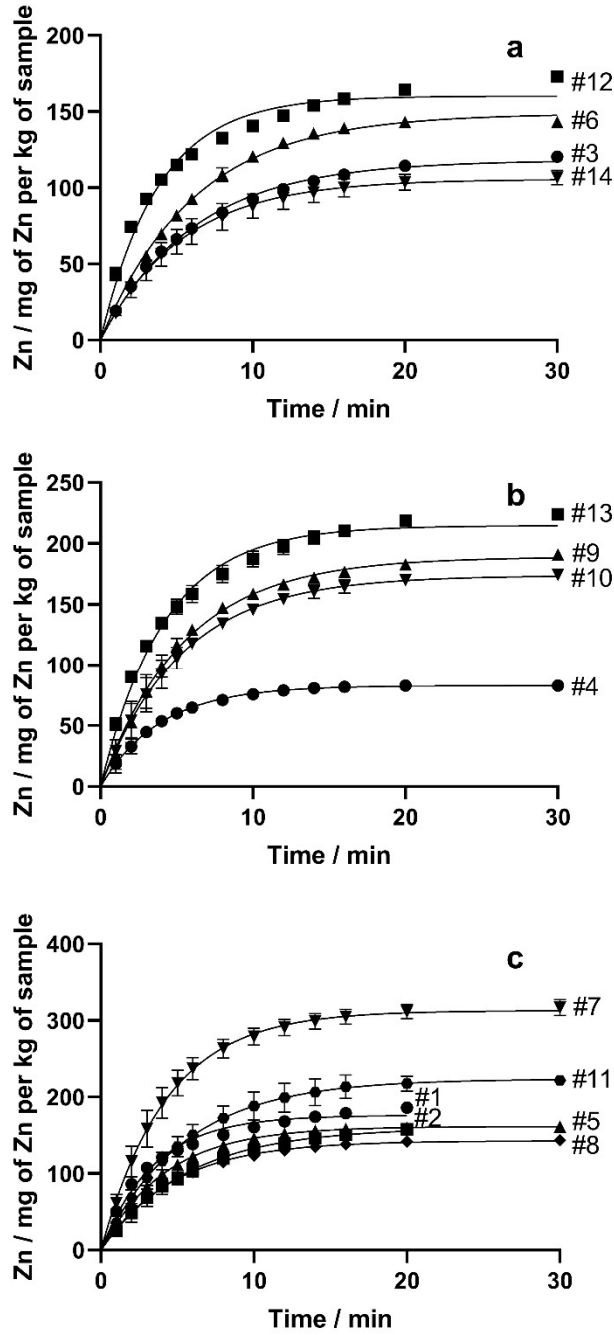

**Figure S4.** Kinetic profiles of bioaccessible Zn obtained for all 14 samples, representing different types of market segment: **(a)** economic dry dog food, **(b)** medium type dry dog food, and **(c)** premium dry dog food,  $n = 2$ . Samples #1 and #2 were subject to the extraction for 20 minutes.

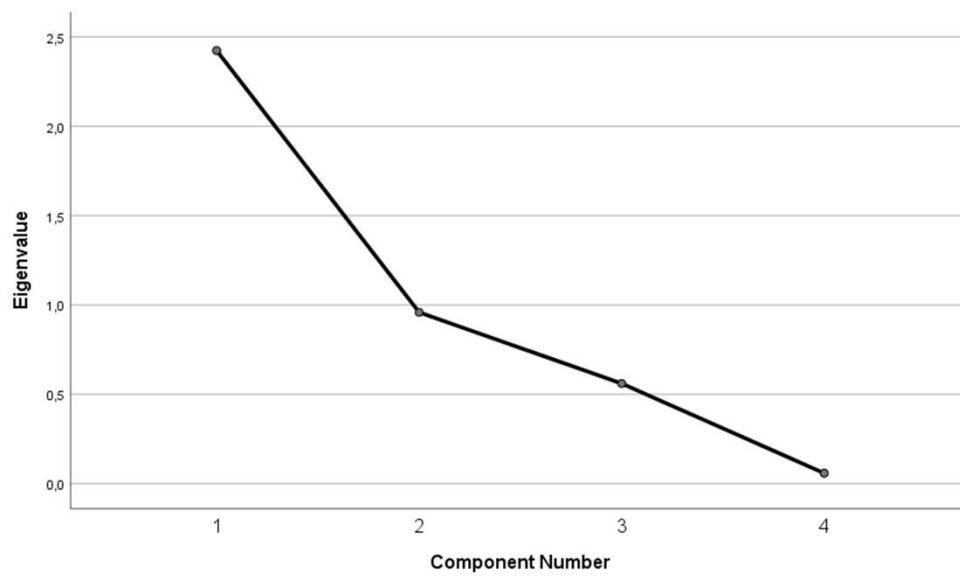

**Figure S5.** Scree plot obtained by PCA.
